# Supplementary material for: Invariant asymmetry renews the lymphatic vasculature during homeostasis
Source: Springer Nature journal article supplement (doi:10.1186/s12967-016-0964-z), 2016-07-11

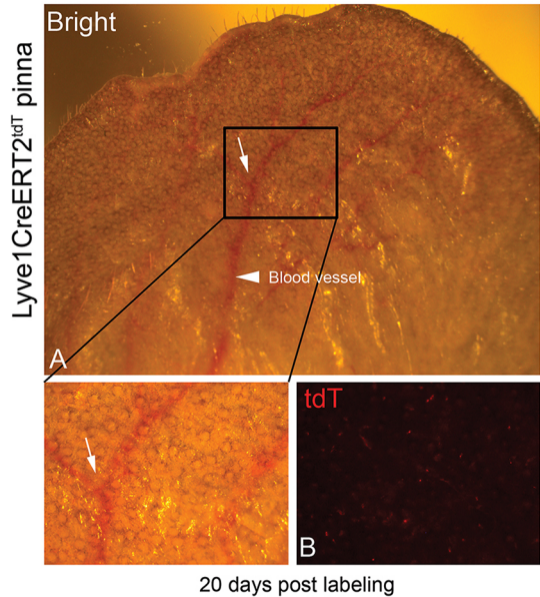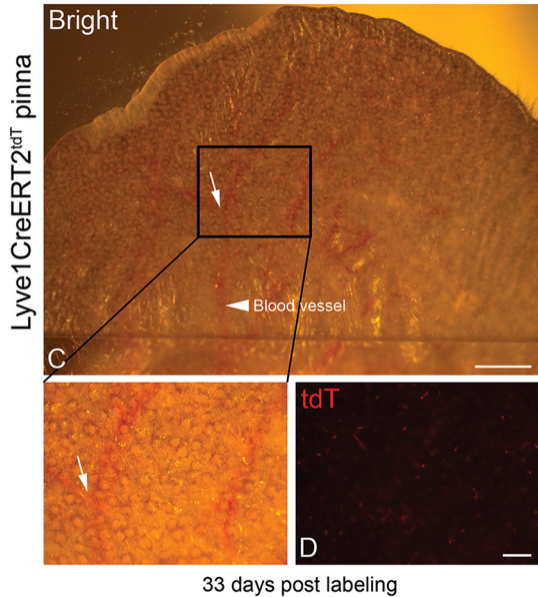

Supplement: MOESM1 [file 10357478]
